# Supplementary material for: Glomerular filtration barrier dysfunction in a self-limiting, RNA virus-induced glomerulopathy resembles findings in idiopathic nephrotic syndromes
Source: PubMed Central journal article supplement (PMC7644703; doi:10.1038/s41598-020-76050-0), 2020-11-05
Supplement: 41598_2020_76050_MOESM1_ESM.pdf [file 41598_2020_76050_MOESM1_ESM.pdf]

## ***Supplemental material***

### **Glomerular filtration barrier dysfunction in a self-limiting, RNA virus-induced glomerulopathy resembles findings in idiopathic nephrotic syndromes**

Christian Nussbag,<sup>1,5</sup> Alisa Stütz,<sup>1</sup> Stefan Hägele,<sup>1</sup> Claudius Speer,<sup>1</sup> Florian Kälble,<sup>1</sup> Christoph Eckert,<sup>2</sup> Thorsten Brenner,<sup>3</sup> Markus A. Weigand,<sup>4</sup> Christian Morath,<sup>1</sup> Jochen Reiser,<sup>5</sup> Martin Zeier,<sup>1</sup> Ellen Krautkrämer,<sup>1</sup>

<sup>1</sup> Department of Nephrology, Heidelberg University Hospital, Germany

<sup>2</sup> Department of Pathology, Heidelberg University Hospital, Germany

<sup>3</sup> Department of Anesthesiology and Intensive Care Medicine, University Hospital Essen, Germany

<sup>4</sup> Department of Anesthesiology, Heidelberg University Hospital, Germany

<sup>5</sup> Department of Internal Medicine, Rush University Medical Center, Chicago, IL, USA.

Tables

**Table S1:** Baseline characteristics of healthy controls in comparison to hantavirus patients

|                              | <b>Hantavirus patients<br/>(n=26)</b><br>Median (Range) | <b>Healthy controls<br/>(n=18)</b><br>Median (Range) | <b>p-value</b>    |
|------------------------------|---------------------------------------------------------|------------------------------------------------------|-------------------|
| Age [years]                  | 36.5 (18-62)                                            | 35.5 (18-63)                                         | 0.694             |
| Sex [male/female]            | 19/7                                                    | 13/5                                                 | 0.963             |
| <b>Laboratory parameters</b> |                                                         |                                                      |                   |
| Serum creatinine max [mg/dl] | 5.1 (1.93-18.02)                                        | 0.78 (0.52-1.10)                                     | <b>&lt;0.0001</b> |
| Serum urea max [mg/dl]       | 88.5 (38.0-221.0)                                       | 29.0 (19.0-44.0)                                     | <b>&lt;0.0001</b> |
| Serum albumin min [g/l]      | 35.4 (22.7-42.4)                                        | n.a.                                                 |                   |
| CRP max [mg/l]               | 59.5 (4.2-151.3)                                        | n.a.                                                 |                   |
| Hemoglobin min [g/dl]        | 12.3 (10.1-14.5)                                        | 15.1 (12.4-16.80)                                    | <b>&lt;0.0001</b> |
| Hematocrit min [l/l]         | 0.35 (0.30-0.44)                                        | 0.44 (0.37-0.48)                                     | <b>&lt;0.0001</b> |
| Platelets min [G/l]          | 126.5 (21.0-291.0)                                      | 228.5 (158.0-401.0)                                  | <b>&lt;0.0001</b> |
| Leukocytes max [G/l]         | 10.1 (5.0-14.5)                                         | 6.41 (4.18-9.78)                                     | <b>&lt;0.0001</b> |
| ACR max [mg/gCr]             | 1,592.9 (13.8-29,759.2)                                 | 5.3 (2.2-13.4)                                       | <b>&lt;0.0001</b> |
| PCR max [mg/gCr]             | 2,930.6 (42.2-50,219.7)                                 | 43.7 (19.1-89.9)                                     | <b>&lt;0.0001</b> |

ACR = albumin-to-creatinine ratio, CRP = C-reactive protein, gCr = gram creatinine, max = maximum, min = minimum, n.a. = not available, PCR = protein-to-creatinine ratio.

**Table S2:** Clinical symptoms of 26 patients with acute hantavirus infection

| <b>Clinical symptoms</b> | <b>All patients<br/>(n=26)</b><br>Patients (%) | <b>Moderate PCR<br/>(n=13)</b><br>Patients (%) | <b>Severe PCR<br/>(n=13)</b><br>Patients (%) | <b>p-value</b> |
|--------------------------|------------------------------------------------|------------------------------------------------|----------------------------------------------|----------------|
| Fever                    | 23 (88.5)                                      | 11 (84.6)                                      | 12 (92.3)                                    | 0.539          |
| Flank pain / Back pain   | 22 (84.6)                                      | 11 (84.6)                                      | 11 (84.6)                                    | 0.588          |
| Abdominal pain           | 16 (61.5)                                      | 7 (53.8)                                       | 9 (69.2)                                     | 0.271          |
| Headache                 | 24 (92.3)                                      | 12 (92.3)                                      | 12 (92.3)                                    | 0.327          |
| Nausea                   | 21 (80.8)                                      | 10 (76.9)                                      | 11 (84.6)                                    | 0.619          |
| Vomiting                 | 18 (69.2)                                      | 9 (69.2)                                       | 9 (69.2)                                     | >0.999         |
| Diarrhea                 | 4 (15.4)                                       | 1 (7.7)                                        | 3 (23.1)                                     | 0.277          |
| Blurred vision           | 13 (50.0)                                      | 8 (61.5)                                       | 5 (38.5)                                     | 0.239          |

PCR = protein-to-creatinine ratio.

**Table S3:** Foot process width in three patients with acute hantavirus infection and one healthy control

| Statistical parameters | Control | Hantavirus patient I | Hantavirus patient II | Hantavirus patient III |
|------------------------|---------|----------------------|-----------------------|------------------------|
| N                      | 117     | 132                  | 122                   | 126                    |
| Mean [nm]              | 516.8   | 488.5                | 442.2                 | 446.4                  |
| SD [nm]                | 353.3   | 347.6                | 279.1                 | 304.8                  |
| Min [nm]               | 84.2    | 125.2                | 109.9                 | 79.8                   |
| Max [nm]               | 1,885.5 | 2,064.2              | 1,998.3               | 2,301.0                |

Max = maximum, min = minimum, SD = standard deviation, N = number of measurements performed.

**Table S4:** Serum suPAR correlation analyses

| Renal parameters | suPAR [pg/mL] on admission |              |
|------------------|----------------------------|--------------|
|                  | r                          | p-value      |
| PCR [mg/gCr]     |                            |              |
| Adm (n=26)       | 0.41                       | <b>0.038</b> |
| 24h (n=24)       | 0.42                       | <b>0.043</b> |
| 48h (n=25)       | 0.41                       | <b>0.042</b> |
| Max (n=26)       | 0.44                       | <b>0.023</b> |
| ACR [mg/gCr]     |                            |              |
| Adm (n=26)       | 0.50                       | <b>0.009</b> |
| 24h (n=24)       | 0.40                       | 0.056        |
| 48h (n=25)       | 0.28                       | 0.192        |
| Max (n=26)       | 0.53                       | <b>0.005</b> |
| IgG [mg/L]       |                            |              |
| Adm (n=26)       | 0.51                       | <b>0.008</b> |
| 24h (n=24)       | 0.39                       | 0.061        |
| 48h (n=21)       | 0.49                       | <b>0.026</b> |
| SCr [mg/dL]      |                            |              |
| Adm (n=26)       | 0.13                       | 0.515        |
| 24h (n=24)       | 0.31                       | 0.127        |
| 48h (n=21)       | 0.29                       | 0.170        |
| Max (n=26)       | 0.30                       | 0.143        |
| Nephrin [ng/mL]  |                            |              |
| Adm (n=26)       | 0.45                       | <b>0.021</b> |
| 24h (n=24)       | 0.36                       | 0.095        |
| 48h (n=21)       | 0.31                       | 0.177        |

ACR = albumin-to-creatinine ratio, Adm = day of admission, IgG = immunoglobulin G, PCR = protein-to-creatinine ratio, SCr = serum creatinine, suPAR = soluble urokinase plasminogen activator receptor.

Figures

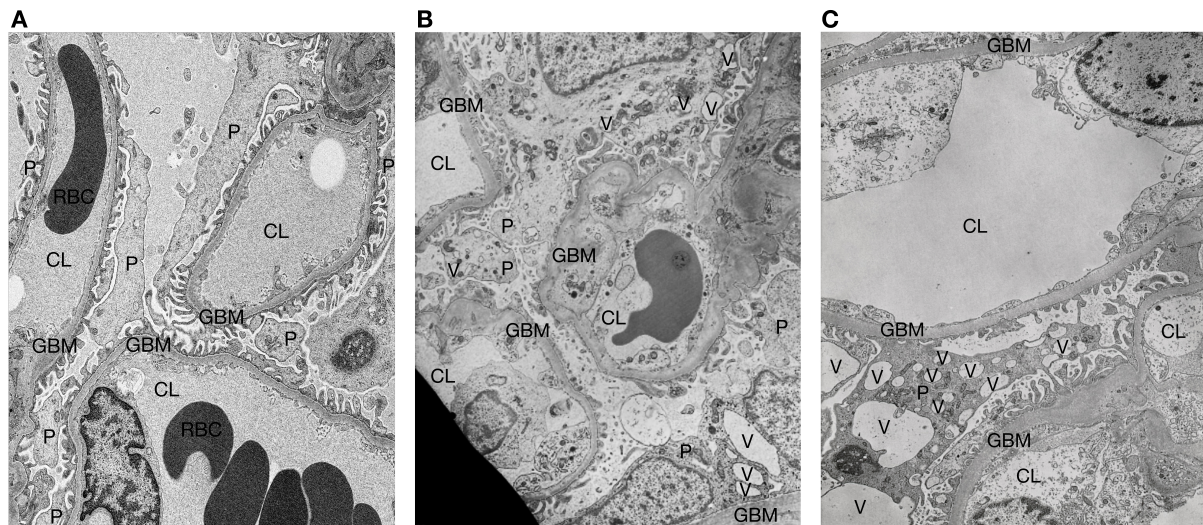

**Figure S1:** Exemplary electron microscopy pictures of podocyte vacuolization in patients with acute hantavirus infection. **A** healthy control (living kidney donation), **B/C** patients with acute hantavirus infection CL = capillary lumen, GBM = glomerular basement membrane, P = podocyte, V = vacuole.

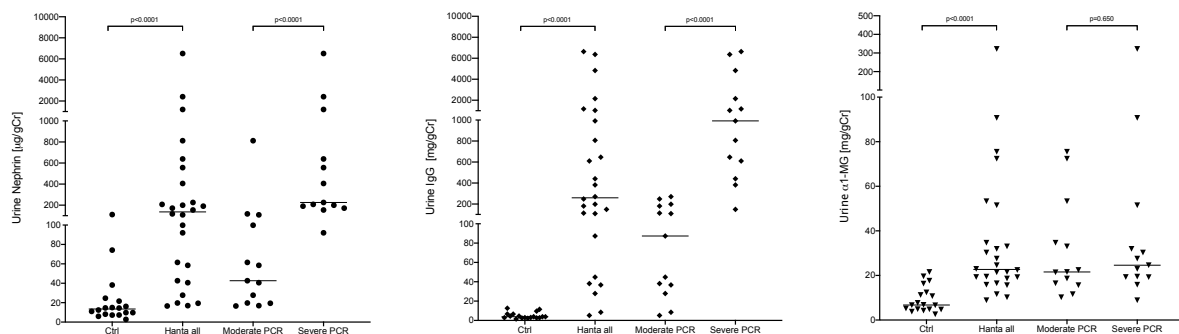

**Figure S2:** Admission levels of urinary nephrin, immunoglobulin G (IgG),  $\alpha$ -1 microglobulin ( $\alpha$ 1-MG) normalized to urinary creatinine excretion and in relation to the extent of total proteinuria (protein-to-creatinine ratio, PCR) in patients with acute hantavirus infection (n=26) and age and gender-matched, healthy controls (n=18).
